# Supplementary material for: Hyperbranched and viologen-functionalized polyglycerols: preparation, photo- and electrochromic performance
Source: Royal Society of Chemistry journal article supplement (doi:10.1039/b818523a), 2009-01-01
Supplement: b818523a.pdf [file b818523a.pdf]

Electronic Supplementary Information (ESI) available: FT-IR,  $^1\text{H}$  NMR,  $^{13}\text{C}$  NMR and  $^{13}\text{C}$  DEPT spectrum of hyperbranched polyglycerols and esterified hyperbranched polyglycerols. See DOI: 10.1039/b000000x/

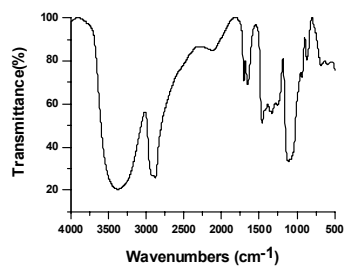

Figure s1. FT-IR spectra of hyperbranched polyglycidol.

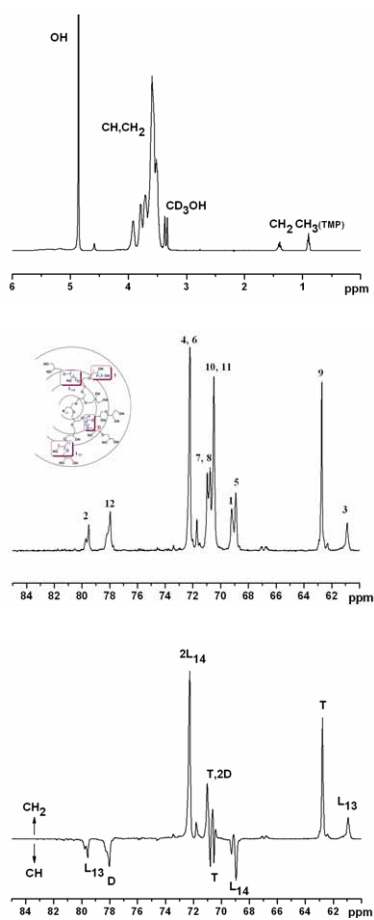

Figure s2.  $^1\text{H}$  NMR,  $^{13}\text{C}$  NMR and  $^{13}\text{C}$  DEPT spectra (400M Hz,  $\text{D}_2\text{O}$ ) of hyperbranched polyglycidol.

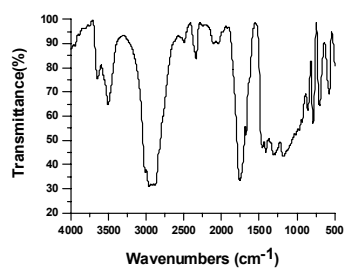

Figure s3. FT-IR spectra of esterified hyperbranched polyglycidol.

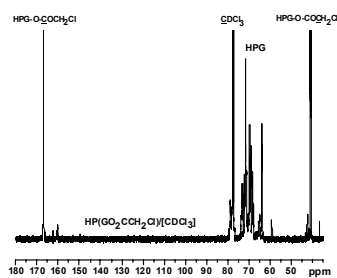

**Figure s4.**  $^{13}\text{C}$  NMR spectra (400 MHz,  $\text{CDCl}_3$ ) of esterified hyperbranched polyglycidol samples.
